# MOSAICS II Study

**Please fill in all blanks before submission**

Country: \_\_\_\_\_ Hospital/ICU: \_\_\_\_\_

Patient Index Number: \_\_\_\_\_ Age of Patient: \_\_\_\_\_

Admission Date to your hospital (DD/MM/YYYY): \_\_\_\_\_ Gender (Tick one): ☐ Male ☐ Female

Admission Date to your ICU (DD/MM/YYYY): \_\_\_\_\_

## 1. Comorbidities

*Please circle yes or no*

|                                              |                                                                                                                                                                                                                                                                                                                                                          |        |
|----------------------------------------------|----------------------------------------------------------------------------------------------------------------------------------------------------------------------------------------------------------------------------------------------------------------------------------------------------------------------------------------------------------|--------|
| Cardiovascular disease                       | Ischaemic heart disease (IHD), heart failure                                                                                                                                                                                                                                                                                                             | Yes/No |
| Chronic Lung Disease                         | Chronic obstructive pulmonary disease (COPD), asthma, bronchiectasis, post-tuberculosis related lung disease, interstitial lung disease (ILD), excluding primary or secondary lung malignancy. Patients who are undergoing treatment for tuberculosis or non-tuberculosis mycobacterium (NTM) prior to ICU admission should be included in this category | Yes/No |
| Chronic neurological disease                 | Strokes, neuromuscular disease, epilepsy, movement disorders, excluding brain tumors                                                                                                                                                                                                                                                                     | Yes/No |
| Chronic Kidney Disease                       | Kidney damage $\geq$ 3 months (abnormal blood/urine composition or radiological renal abnormalities or glomerular filtration rate $<$ 60mL/min/1.73m <sup>2</sup> ), excluding renal cell carcinoma                                                                                                                                                      | Yes/No |
| Peptic Ulcer Disease                         | Gastric and duodenal ulcers                                                                                                                                                                                                                                                                                                                              | Yes/No |
| Chronic liver disease                        | Prolonged course of hepatic disease $>$ 6 months, excluding hepatocellular cancer                                                                                                                                                                                                                                                                        | Yes/No |
| Diabetes mellitus                            | Any type of diabetes mellitus                                                                                                                                                                                                                                                                                                                            | Yes/No |
| Human immunodeficiency virus (HIV) infection | Positive HIV serology with or without acquired immunodeficiency syndrome (AIDS)-defining illness                                                                                                                                                                                                                                                         | Yes/No |
| Connective tissue disease                    | Presence of appropriate clinical symptoms and high titres of specific autoantibodies that fulfill the criteria of different connective tissue diseases. Examples include systemic lupus erythematosus (SLE), rheumatoid arthritis (RA), gout, systemic sclerosis, scleroderma                                                                            | Yes/No |
| Immunosuppression                            | Patients on long term steroids or other immunosuppressants (excluding patients with haematological conditions or other malignancies)                                                                                                                                                                                                                     | Yes/No |
| Haematological malignancies                  | Include leukaemia, lymphoma, multiple myeloma                                                                                                                                                                                                                                                                                                            | Yes/No |
| Solid malignant tumours                      | Such as breast, colon, lung, prostate, skin, etc                                                                                                                                                                                                                                                                                                         | Yes/No |
| Others (Please specify):                     |                                                                                                                                                                                                                                                                                                                                                          |        |

1a. Type of Admission (Tick one): ☐ Medical  
☐ Elective Surgical  
☐ Unscheduled Surgical

**Society of Intensive Care Medicine (Singapore) Secretariat**

c/o Wizlink Consulting Pte Ltd

Vision Exchange, 2 Venture Drive, #16-16, Singapore 608526

Tel: (65) 6774 5201 • Fax: (65) 6774 5203 • Website: [www.sicm.org.sg](http://www.sicm.org.sg) • Email: [secretariat@sicm.org.sg](mailto:secretariat@sicm.org.sg)

1b. Source of Admission (Tick one):

- ☐ Emergency Department
- ☐ Operating Room
- ☐ General Wards
- ☐ Other ICUs or High-dependency Units
- ☐ Inter-hospital Transfer
- ☐ Others

## 2. Vital Signs (Upon admission into ICU)

|                                         |  |                                 |  |
|-----------------------------------------|--|---------------------------------|--|
| Mean blood or arterial pressure (mmHg): |  | Systolic blood pressure (mmHg): |  |
| Heart rate (beats per min):             |  | Temperature (degree Celsius):   |  |
| Respiratory rate (breaths per min):     |  | Glasgow Coma Scale:             |  |

## 3. Blood Investigations

*Record those that are obtained within the first 24 hours of ICU admission. The results closest to the time of ICU admission should be the ones recorded. If no such investigations are available within the 1st 24 hours of ICU admission, record the results which are obtained within 4 hours prior to ICU admission, with preference being given to those closest to the time of ICU admission*

|                                             |  |                                           |  |
|---------------------------------------------|--|-------------------------------------------|--|
| Total white cell count ( $\times 10^9/L$ ): |  | Platelets ( $\times 10^9/L$ ):            |  |
| Haemoglobin (g/dl):                         |  | Haematocrit (%):                          |  |
| Potassium (mmol/l):                         |  | Sodium (mmol/l):                          |  |
| Creatinine ( $\mu\text{mol/l}$ ):           |  | Bilirubin ( $\mu\text{mol/l}$ ):          |  |
| pH:                                         |  | PaO <sub>2</sub> (mmHg):                  |  |
| FiO <sub>2</sub> :                          |  | PaO <sub>2</sub> /FiO <sub>2</sub> ratio: |  |

| Oxygen tank flow rate in liters/min                                       | FiO <sub>2</sub>                         |
|---------------------------------------------------------------------------|------------------------------------------|
| Nasal cannula                                                             |                                          |
| 0 L/min                                                                   | 0.21                                     |
| 1 L/min                                                                   | 0.24                                     |
| 2 L/min                                                                   | 0.28                                     |
| 3 L/min                                                                   | 0.32                                     |
| 4 L/min                                                                   | 0.36                                     |
| 5 L/min                                                                   | 0.40                                     |
| 6 L/min                                                                   | 0.44                                     |
| Face mask                                                                 |                                          |
| 5 L/min                                                                   | 0.4                                      |
| 6 L/min                                                                   | 0.5                                      |
| 7-8 L/min                                                                 | 0.6                                      |
| Nasopharyngeal catheter                                                   |                                          |
| 4 L/min                                                                   | 0.4                                      |
| 5 L/min                                                                   | 0.5                                      |
| 6 L/min                                                                   | 0.6                                      |
| Venturi mask                                                              | FiO <sub>2</sub> as set on the apparatus |
| Face mask with reservoir                                                  |                                          |
| 6 L/min                                                                   | 0.6                                      |
| 7 L/min                                                                   | 0.7                                      |
| 8 L/min                                                                   | 0.8                                      |
| 9 L/min                                                                   | 0.9                                      |
| 10 L/min                                                                  | 0.95                                     |
| 15 L/min (non-rebreather mask)                                            | 1.0                                      |
| High flow nasal cannula, non-invasive ventilation, mechanical ventilation |                                          |
| Regardless of inspiratory flow, positive end-expiratory pressure (PEEP)   | FiO <sub>2</sub> as set on the apparatus |

#### 4. Severity of Illness Scores

|                                |       |                                                  |       |
|--------------------------------|-------|--------------------------------------------------|-------|
| qSOFA at time of ICU admission | _____ | SOFA at time of ICU admission                    | _____ |
| SIRS at time of ICU admission  | _____ | APACHE II (over first 24 hours of ICU admission) | _____ |

#### 5. Site of Infection

##### *Definition of infections*

- *Pneumonia requires the presence of radiographic infiltrates and features including fever or hypothermia, leukocytosis or leukopenia and purulent respiratory secretions.*
- *Intra-abdominal infections include but are not limited to intra-abdominal abscesses, peritonitis, biliary tract infections, pancreatic infections, enteritis, and colitis.*
- *Urinary tract infection requires typical features of fever, urgency, frequency, dysuria, pyuria and haematuria, together with confirmatory radiological features and/or positive culture results.*
- *Soft tissue and skin infections include surgical site infections, septic arthritis, cellulitis and necrotizing fasciitis.*
- *Catheter-related blood stream infection is defined as bacteremia with an intravascular device in situ and no other apparent source for the bloodstream infection, with culture results.*
- *Systemic infections refer to infections without a clear primary site of infection, as is often the case in infections such as dengue and malaria.*

**Society of Intensive Care Medicine (Singapore) Secretariat**

c/o Wizlink Consulting Pte Ltd

Vision Exchange, 2 Venture Drive, #16-16, Singapore 608526

Tel: (65) 6774 5201 • Fax: (65) 6774 5203 • Website: [www.sicm.org.sg](http://www.sicm.org.sg) • Email: [secretariat@sicm.org.sg](mailto:secretariat@sicm.org.sg)

Please tick all that apply

- ☐ Respiratory
- ☐ Urinary Tract
- ☐ Abdominal
- ☐ Neurological
- ☐ Bones or Joints
- ☐ Skin or Cutaneous Sites
- ☐ Intravascular Catheter
- ☐ Infective Endocarditis
- ☐ Primary Bacteraemia
- ☐ Systemic
- ☐ Others, Please Specify: \_\_\_\_\_

## 6. Positive Cultures

Please tick all that apply

### Gram-positive

- ☐ Methicillin-sensitive *Staphylococcus aureus*
- ☐ Methicillin-resistant *Staphylococcus aureus*
- ☐ *Streptococcus pneumoniae*
- ☐ Other *Streptococcus* species
- ☐ *Enterococcus*

### Gram-negative

- ☐ *Klebsiella pneumoniae*
- ☐ *Escherichia coli*
- ☐ *Pseudomonas aeruginosa*
- ☐ *Acinetobacter baumannii*
- ☐ *Burkholderia pseudomallei*
- ☐ *Enterobacter cloacae*
- ☐ *Haemophilus influenza*
- ☐ *Salmonella* species
- ☐ *Citrobacter* species
- ☐ *Stenotrophomonas maltophilia*
- ☐ *Proteus* species
- ☐ *Bacteroides fragilis*

### Fungal

- ☐ *Candida albicans*
- ☐ *Candida non-albicans*
- ☐ *Aspergillus* species

- ☐ Negative Cultures
- ☐ Others, Please Specify: \_\_\_\_\_

## 7. Positive Serologies, Molecular, or Histological Tests

Please tick all that apply

|                                                |                                       |                          |
|------------------------------------------------|---------------------------------------|--------------------------|
| Tetanus                                        |                                       | <input type="checkbox"/> |
| Tuberculosis                                   | Positive culture from any medium      | <input type="checkbox"/> |
|                                                | Histological diagnosis                | <input type="checkbox"/> |
|                                                | Polymerase chain reaction (PCR) tests | <input type="checkbox"/> |
| Non-tuberculous mycobacteria                   | Positive culture from any medium      | <input type="checkbox"/> |
|                                                | Histological diagnosis                | <input type="checkbox"/> |
| Aspergillosis                                  |                                       | <input type="checkbox"/> |
| Blastomycosis                                  |                                       | <input type="checkbox"/> |
| Histoplasmosis                                 | Antigen testing (Urine)               | <input type="checkbox"/> |
|                                                | Antigen testing (Serum)               | <input type="checkbox"/> |
| Cryptococcus                                   |                                       | <input type="checkbox"/> |
| Malaria                                        | Thick and thin blood films            | <input type="checkbox"/> |
|                                                | Rapid diagnostic tests (Serum)        | <input type="checkbox"/> |
| Measles                                        | Serum serology (presence of IgM)      | <input type="checkbox"/> |
|                                                | PCR tests                             | <input type="checkbox"/> |
| Chikungunya                                    | Serum                                 | <input type="checkbox"/> |
|                                                | CSF serology (presence of IgM)        | <input type="checkbox"/> |
|                                                | PCR tests                             | <input type="checkbox"/> |
| Dengue                                         | Serum antigen                         | <input type="checkbox"/> |
|                                                | Serology (presence of IgM)            | <input type="checkbox"/> |
|                                                | PCR tests                             | <input type="checkbox"/> |
| Influenza                                      | PCR tests                             | <input type="checkbox"/> |
|                                                | Immunofluorescence assays from BAL    | <input type="checkbox"/> |
|                                                | Endotracheal aspirate                 | <input type="checkbox"/> |
|                                                | Nasopharyngeal swabs                  | <input type="checkbox"/> |
|                                                | Nasal swabs                           | <input type="checkbox"/> |
|                                                | Throat swabs                          | <input type="checkbox"/> |
| Other respiratory viruses apart from influenza | PCR tests                             | <input type="checkbox"/> |
|                                                | Immunofluorescence assays from BAL    | <input type="checkbox"/> |
|                                                | Endotracheal aspirate                 | <input type="checkbox"/> |
|                                                | Nasopharyngeal swabs                  | <input type="checkbox"/> |
|                                                | Nasal swabs                           | <input type="checkbox"/> |
|                                                | Throat swabs                          | <input type="checkbox"/> |
| Rabies                                         |                                       | <input type="checkbox"/> |
| Leptospirosis                                  |                                       | <input type="checkbox"/> |
| Q fever                                        |                                       | <input type="checkbox"/> |
| Rickettsia                                     | Serum                                 | <input type="checkbox"/> |
|                                                | Eschar serology (presence of IgM)     | <input type="checkbox"/> |

Please circle yes or no

7a. Clinical diagnosis made and persisted with due to strong clinical suspicion even though cultures, serologies, molecular, and/or histological tests were performed and negative Yes / No

7b. Clinical diagnosis made and persisted with due to strong clinical suspicion because cultures, serologies, molecular, and/or histological tests are not available in the ICU Yes / No

## 8. Measurements around Time Zero

8a. Time Zero ( DD/MM/YY (HH:MM) ) : \_\_\_\_\_ ( \_\_\_\_\_ )

*Time zero is the onset of sepsis. This is determined according to the patient's location within the hospital when sepsis is diagnosed:*

- i. For patients presenting to the emergency department with sepsis, time zero is defined as the time of triage.*
- ii. For patients who develop sepsis in the wards or other non-emergency department units, time zero is determined by searching the clinical documentation for the time of diagnosis of sepsis. This may include, for example, a physician's note or timed and dated orders, a timed and dated note of a nurse's discussion of sepsis with a physician, or timed records initiating referral to the ICU for sepsis.*
- iii. If no time and date can be found by searching the chart, the default time of presentation is the time of admission to the ICU.*
- iv. In the rare event that the patient does not present with sepsis in the emergency department, but deteriorates and develops sepsis in the emergency department while being observed or while waiting for a hospital bed, time zero is determined by searching the clinical documentation for the time of diagnosis of sepsis. This may include, for example, a physician's note or timed and dated orders, a timed and dated note of a nurse's discussion of sepsis with a physician, or timed records initiating referral to the ICU for sepsis.*

For the following questions, please circle yes or no

### Blood Culture

8.1. Was blood culture performed between 1 hour before time zero to 24 hours after time zero? Yes / No

8.2. If yes, time of blood culture ( DD/MM/YY (HHMM) ) : \_\_\_\_\_ ( \_\_\_\_\_ )

### Lactate Measurement

8.3. Was lactate measured between 1 hour before time zero to 24 hours after time zero? Yes / No

8.3a. If yes:

Time of lactate measurement ( DD/MM/YY (HHMM) ) : \_\_\_\_\_ ( \_\_\_\_\_ )

Lactate value (mmol/l): \_\_\_\_\_

## Antibiotic Administration

8.4: Was antibiotic administered between 1 hour before time zero to 24 hours after time zero? Yes / No

8.4.a: If yes, time of antibiotic administration (DD/MM/YY (HHMM)) : \_\_\_\_\_ ( \_\_\_\_\_ )

## Fluid Bolus

8.5: Was there any episode of hypotension (SBP < 90 mmHg or mean blood pressure or MAP < 65 mmHg) between time zero and 1 hour after time zero? Yes / No

8.5.a: If the answer to 8.5 is no, was there any episode of hypotension (SBP < 90 mmHg or mean blood pressure or MAP < 65 mmHg) between time zero and 3 hours after time zero? Yes / No

8.5.b: If answer to questions 8.5 & 8.5.a is yes, was any vasopressor started between 1 hour before time zero to 24 hours after time zero? Yes / No

8.5.c: If answer to 8.5.b is yes, time of starting vasopressor (DD/MM/YY (HHMM)) : \_\_\_\_\_ ( \_\_\_\_\_ )

8.5.d: Amount of fluid bolus administered within 1 hour from time zero (mLs): \_\_\_\_\_

8.5.e: Amount of fluid bolus administered within 3 hours from time zero (mLs): \_\_\_\_\_

## **9. Resources used in ICU (Anytime during ICU stay)**

*For the following questions, please circle yes or no*

9.1: Vasopressors / Intropes Yes / No

9.2: Mechanical ventilation (MV), performed through a laryngeal mask, an endotracheal, endobronchial or tracheostomy tube Yes / No

*If answer is no, skip next question*

9.3: If yes, duration of MV, defined as from the time of starting invasive MV until the patient has been successfully extubated or breathing on a tracheostomy mask for ≥ 48 hours, whichever comes first (days) \_\_\_\_\_

9.4: Noninvasive ventilation (NIV) using NIPPV or CPAP (excludes NIV used peri-intubation and extubation) Yes / No

*If answer is no, skip next question*

9.5: If yes, duration of NIV, defined as from the time of starting NIV until the patient has been successfully weaned off for > 24 hours or required subsequent intubation, whichever comes first (days) \_\_\_\_\_

9.6: High-flow nasal cannula (HFNC) (excludes HFNC used peri-intubation and extubation) Yes / No

*If answer is no, skip next question*

---

**Society of Intensive Care Medicine (Singapore) Secretariat**

c/o Wizlink Consulting Pte Ltd

Vision Exchange, 2 Venture Drive, #16-16, Singapore 608526

Tel: (65) 6774 5201 • Fax: (65) 6774 5203 • Website: [www.sicm.org.sg](http://www.sicm.org.sg) • Email: [secretariat@sicm.org.sg](mailto:secretariat@sicm.org.sg)

9.7: If yes, duration of HFNC, defined as from the time of starting HFNC until patient has been successfully weaned off for > 24 hours or required subsequent intubation, whichever comes first (days)

9.8: Renal replacement therapy (IHD, PD, SLED or CRRT) Yes / No

9.9: Transfusion of packed red blood cells Yes / No

9.10: Transfusion of platelets Yes / No

9.11: Transfusion of fresh frozen plasma Yes / No

9.12: Non-surgical source control measure implemented e.g. removal of infected intravascular or other catheters, insertion of ascitic drains, pleural drains, percutaneous drains, and others Yes / No

9.13: Surgical source control measure implemented e.g. debridement of infected necrotic tissue Yes / No

9.14: Time of first source control measure, if any (DD/MM/YY (HHMM)) : \_\_\_\_\_ ( \_\_\_\_\_ )

## 10. Limitations of Life-Sustaining Treatments

*Please tick all that apply*

- ☐ Do-not-resuscitate (DNR) order
- ☐ Withdrawal of life-sustaining treatments
- ☐ Withholding of life-sustaining treatments

## 11. Outcome

*Please pick only one*

- ☐ Alive upon current hospital stay discharge
- ☐ Alive upon discharge from current ICU stay, but died in current hospital stay
- ☐ Died in current ICU stay

Discharge date from current ICU stay or death date in your current ICU stay (DD/MM/YYYY): \_\_\_\_\_

Discharge date from current hospital stay or death date in your current hospital stay (DD/MM/YYYY): \_\_\_\_\_
